# Supplementary material for: MRI Imaging Characteristics of Glioblastoma with Concurrent Gain of Chromosomes 19 and 20
Source: MDPI journal article supplement (doi:10.3390/tomography7020021), 2021-06-02
Supplement: s1 [file s1]

|        | MGMT<br>metylation | T1/Flair ratio<br>(expansive = 0) | Diffusion<br>restriction | Pial invasion | Ependymal<br>extension | Hemorrhage | Multifocal or<br>multicentric | Satellites | Overall survival<br>(months) |
|--------|--------------------|-----------------------------------|--------------------------|---------------|------------------------|------------|-------------------------------|------------|------------------------------|
| MUT001 | 0                  | 0                                 | 1                        | 0             | 0                      | 1          | 0                             | 1          | 18                           |
| MUT002 | 0                  | 0                                 | 0                        | 1             | 1                      | 1          | 1                             | 0          | 20                           |
| MUT003 | 0                  | 1                                 | 0                        | 0             | 0                      | 0          | 0                             | 0          | 15                           |
| MUT004 | 0                  | 1                                 | 1                        | 0             | 1                      | 1          | 1                             | 0          | 22                           |
| MUT005 | 0                  | 1                                 | 1                        | 1             | 1                      | 1          | 0                             | 0          | 5                            |
| MUT006 | 0                  | 1                                 | 0                        | 0             | 1                      | 1          | 0                             | 0          | 31                           |
| MUT007 | 0                  | 1                                 | 1                        | 1             | 0                      | 1          | 0                             | 0          | 13                           |
| MUT008 | 0                  | 1                                 | 0                        | 0             | 1                      | 0          | 0                             | 1          | 4                            |
| MUT009 | 0                  | 1                                 | 0                        | 0             | 0                      | 1          | 0                             | 0          | 31                           |
| MUT010 | 0                  | 1                                 | 0                        | 0             | 0                      | 0          | 1                             | 1          | 8                            |
| MUT011 | 0                  | 1                                 | 1                        | 0             | 1                      | 1          | 0                             | 0          | 8                            |
| MUT012 | 1                  | 1                                 | 1                        | 0             | 1                      | 1          | 0                             | 0          | 83                           |
| MUT013 | 1                  | 0                                 | 1                        | 1             | 1                      | 1          | 1                             | 0          | 30                           |
| MUT014 | 1                  | 1                                 | 1                        | 1             | 1                      | 1          | 0                             | 0          | 15                           |
| MUT015 | 1                  | 1                                 | 0                        | 0             | 1                      | 0          | 1                             | 1          | 6                            |
| MUT016 | 1                  | 0                                 | 1                        | 0             | 0                      | 0          | 1                             | 1          | 7                            |
| MUT017 | 1                  | 1                                 | 0                        | 0             | 1                      | 0          | 0                             | 0          | 16                           |
| MUT018 | 1                  | 1                                 | 0                        | 1             | 0                      | 0          | 0                             | 0          | 3                            |

*p-value comparing the met+ / met- groups  
(Fisher's two tail exact, t-test)*

1.00 1.00 0.63 0.64 0.33 0.63 1.00 0.45

|        |   |   |   |   |   |   |   |   |    |
|--------|---|---|---|---|---|---|---|---|----|
| CON001 | 0 | 0 | 1 | 1 | 1 | 1 | 0 | 0 | 16 |
| CON002 | 0 | 1 | 0 | 1 | 1 | 0 | 0 | 0 | 5  |
| CON003 | 0 | 1 | 0 | 0 | 1 | 1 | 0 | 0 | 13 |
| CON004 | 0 | 1 | 1 | 0 | 0 | 1 | 0 | 0 | 5  |
| CON005 | 0 | 0 | 1 | 0 | 1 | 0 | 0 | 0 | 9  |
| CON006 | 0 | 1 | 1 | 1 | 1 | 1 | 0 | 0 | 2  |
| CON007 | 0 | 1 | 1 | 1 | 1 | 1 | 1 | 1 | 9  |
| CON008 | 0 | 1 | 0 | 1 | 1 | 1 | 0 | 1 | 9  |
| CON009 | 0 | 1 | 1 | 1 | 1 | 1 | 0 | 0 | 7  |
| CON010 | 0 | 0 | 1 | 1 | 1 | 1 | 0 | 0 | 6  |
| CON011 | 0 | 1 | 1 | 1 | 1 | 1 | 1 | 0 | 10 |
| CON012 | 0 | 1 | 0 | 1 | 1 | 0 | 0 | 1 | 11 |
| CON013 | 1 | 1 | 1 | 1 | 0 | 1 | 0 | 0 | 19 |
| CON014 | 1 | 1 | 0 | 0 | 1 | 0 | 1 | 1 | 7  |
| CON016 | 1 | 1 | 1 | 1 | 1 | 1 | 0 | 1 | 9  |
| CON017 | 1 | 1 | 0 | 0 | 0 | 0 | 0 | 1 | 49 |
| CON018 | 1 | 0 | 1 | 1 | 0 | 0 | 0 | 0 | 69 |
| CON019 | 1 | 1 | 1 | 1 | 0 | 0 | 1 | 0 | 10 |
| CON020 | 1 | 1 | 0 | 0 | 0 | 1 | 1 | 1 | 3  |

*p-value comparing the met+ / met- groups  
(Fisher's two tail exact, t-test)*

1.00 1.00 0.62 0.01 0.33 0.30 0.33 0.05

p-value comparing the overall survival between the control and the 19/20 co-gain groups = 0.44 (t-test)
